# Supplementary material
Source: Springer Nature journal article supplement (https://www.springermedizin.de/resource/supplementary/12883_2009_292_MOESM3_ESM.pdf/9455044)

Patient

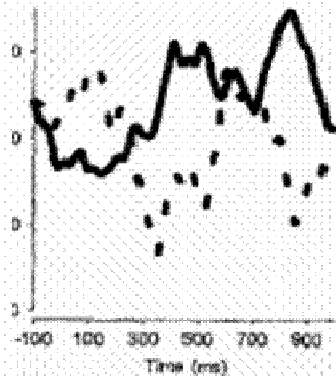

Healthy Control

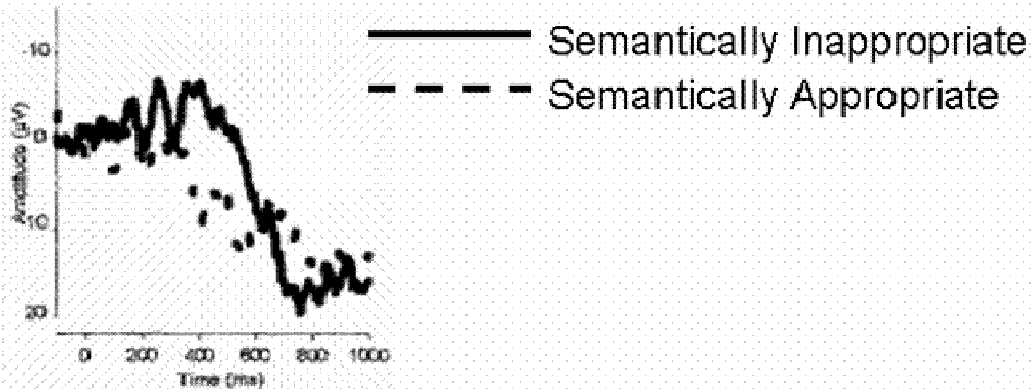

Supplement: MOESM3 [file 9455044]
